# Supplementary material
Source: MDPI journal article supplement (https://www.mdpi.com/1999-4907/11/9/922)
Supplement: s1 [file s1]

**Table S1.** Dates of Inoculation and investigations.

| Test site | 2015                    | 2016                    | 2017                    |
|-----------|-------------------------|-------------------------|-------------------------|
| TBO       | July 7th/September 17th | July 7th/September 17th | July 4th/September 13th |
| FTBC      | July 7th/September 18th | July 6th/September 15th | July 3th/September 14th |
| KABO      | July 8th/September 15th | July 6th/September 13th | July 7th/September 14th |
| SSG       | July 9th/September 28th | July 7th/September 29th | -                       |
| KYBO      | July 7th/September 15th | July 5th/September 16th | July 5th/September 13th |

-: Inoculation test could not be conducted., Test site abbreviations: Tohoku Regional Breeding Office (TBO), Forest Tree Breeding Center (FTBC), Kansai Regional Breeding Office (KABO), Shikoku Breeding Stock Garden (SSG), Kyushu Regional Breeding Office (KYBO).

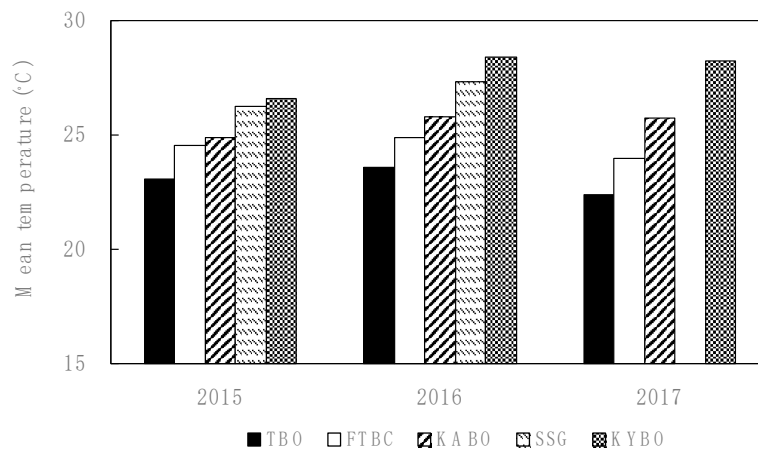

**Figure 1.** Mean temperatures for the current inoculation test period at each test site in 2015, 2016, and 2017. This Figure was created from data obtained from AMeDAS (Automated Meteorological Data Acquisition System) of Japan Meteorological Agency (<http://www.data.jma.go.jp/obd/stats/etrn/index.php>). Test site abbreviations: Tohoku Regional Breeding Office (TBO), Forest Tree Breeding Center (FTBC), Kansai Regional Breeding Office (KABO), Shikoku Breeding Stock Garden (SSG), and Kyushu Regional Breeding Office (KYBO).
